# Supplementary material for: Granular polymer composites
Source: Royal Society of Chemistry journal article supplement (doi:10.1039/c2sm26786a), 2012-01-01
Supplement: c2sm26786a.pdf [file c2sm26786a.pdf]

# Supporting Information for “Granular polymer composites”

Ahmad Mohaddespour & Reghan J. Hill\*

Department of Chemical Engineering,  
McGill University,  
Montreal,  
Quebec, H3A 0C5,  
Canada

\*Correspondence: Tel.: 514 398 6897; E-mail: reghan.hill@mcgill.ca

September 15, 2012

## 1 Characteristic ratio for restricted-bond-angle chains

A Matlab computer program was written to generate random walks of chains having  $N$  monomers, restricted bond angle  $\theta$ , and fixed bond length  $l$ . The characteristic ratio  $C_\infty = R_0^2/[(N-1)l^2]$  is plotted in figure 1 versus  $N$  for  $\theta \leq \pi = 180^\circ$  (ideal chains) and  $\theta \leq \pi/5 = 36^\circ$ . The standard deviations of fluctuations about the mean, obtained from  $10^4$  random chain configurations for each  $N$ , are indicated by the error bars. With  $\theta \leq 180^\circ$ , the data with  $N \geq 64$  is well described by a two-parameter model  $C_\infty = C_\infty(N \rightarrow \infty) - c_1 N^{-1}$ , furnishing  $C_\infty(N \rightarrow \infty) \approx 1.001$  (with  $c_1 \approx 1.247$ ). With  $\theta \leq 36^\circ$ , however, the data with  $N \geq 64$  is better described by a three-parameter model  $C_\infty = C_\infty(N \rightarrow \infty) - c_1 \exp(-N/c_2)$ , furnishing  $C_\infty(N \rightarrow \infty) \approx 19.50$  (with  $c_1 \approx 6.694$  and  $c_2 \approx 81.41$ ). Note that the standard deviation of the fluctuations in the mean-squared end-to-end distance  $R_0^2$  scale as  $Nl^2$  as  $N \rightarrow \infty$ .

Limiting bond angles to  $\theta < 36^\circ$  furnished a characteristic ratio that increases from  $\approx 5$  when  $N = 10$  toward a plateau  $C_\infty(N \rightarrow \infty) \approx 19.5$  when  $N \gtrsim 300$ . Quantifying

chain dimensions with  $R_0 = l\sqrt{C_\infty N} \approx 9.8\sqrt{N}$  mm shows that  $R_0 \gtrsim D$  when  $N \gtrsim 6$  with  $D = 2.5$  cm, and  $N \gtrsim 50$  with  $D = 7$  cm.

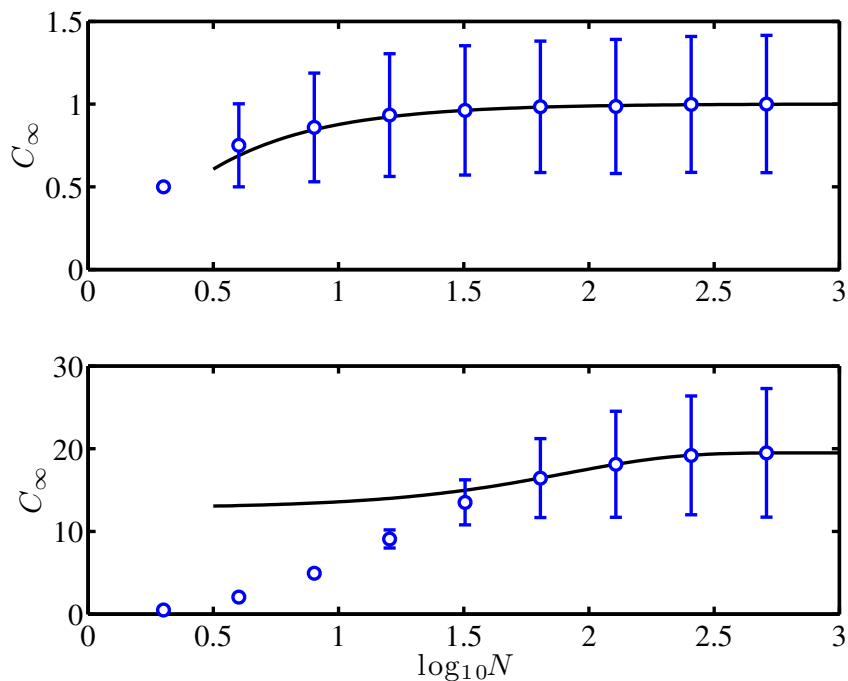

Figure 1: The characteristic ratio  $C_\infty$  versus the number of monomers  $N$  for ideal chains ( $\theta \leq 180^\circ$ , top) and chains with restricted bond angles  $\theta \leq 36^\circ$  (bottom). Error bars indicate the standard deviations of fluctuations about the mean, obtained by averaging over  $10^4$  randomly generated chain configurations. The characteristic ratios as  $N \rightarrow \infty$ , obtained by fitting empirical models (lines) to the data with  $N \geq 64$  (lines) are  $C_\infty(N \rightarrow \infty) \approx 1.001$  ( $\theta \leq 180^\circ$ ) and  $19.50$  ( $\theta \leq 36^\circ$ ).

## 2 Virial coefficients

The scaled partial molar sphere volume

$$\bar{V}_s \equiv v_s^{-1} \left( \frac{\partial V}{\partial n_s} \right)_{n_b} = \phi^{-1} - (1 - x_s)[x_s + (1 - x_s)v_b/v_s]\phi^{-2} \left( \frac{\partial \phi}{\partial x_s} \right). \quad (1)$$

The virial coefficients in the main text

$$\bar{V}_s^0 = \phi_c^{-1} - \frac{v_b}{v_s} \phi_c^{-2} \left( \frac{\partial \phi}{\partial x_s} \right)_{x_s=0} \quad (2)$$

and

$$\bar{V}_s^{-1} = \frac{v_b}{v_s} \phi_c^{-1} \left( \frac{\partial \bar{V}_s}{\partial x_s} \right)_{x_s=0} \quad (3)$$

are therefore furnished by experimental measurements of  $\phi(x_s)$ .

### 3 Supplementary thermodynamic formulas

Similarly to the main text for sphere (nanoparticle) partial molar volume, the ball (monomer) partial molar volume scaled with the intrinsic ball volume  $v_b = 4\pi a_b^3/3$  is

$$\bar{V}_b \equiv v_b^{-1} \left( \frac{\partial V}{\partial n_b} \right)_{n_s} \quad (4)$$

$$= \phi^{-1} + x_s [1 + x_s (v_s/v_b - 1)] \phi^{-2} \left( \frac{\partial \phi}{\partial x_s} \right). \quad (5)$$

Moreover, to leading order at vanishing sphere mole fraction ( $x_s \rightarrow 0$ ),

$$\bar{V}_b = \phi_c^{-1} + O(\phi_s^2). \quad (6)$$

When  $a_s \gtrsim l_l$  and, thus, spheres contribute only their intrinsic volume to the mixture, without disturbing the bulk chain packing,

$$\left( \frac{\partial \phi}{\partial x_s} \right)_{x_s=0} = \frac{v_s}{v_b} (\phi_c - \phi_c^2) \text{ when } \bar{V}_s^0 = 1. \quad (7)$$

Moreover, when  $a_s \lesssim l_l$  and, thus, spheres merely fill voids in the bulk chain packing,

$$\left( \frac{\partial \phi}{\partial x_s} \right)_{x_s=0} = \frac{v_s}{v_b} \phi_c \text{ when } \bar{V}_s^0 = 0. \quad (8)$$

In the dilute regime,

$$\phi_s \equiv n_s v_s V^{-1} = \frac{x_s v_s \phi}{x_s v_s + (1 - x_s) v_b} \sim x_s \phi_c \frac{v_s}{v_b} \text{ as } x_s \rightarrow 0. \quad (9)$$

Moreover,

$$\begin{aligned} \left( \frac{\partial \bar{V}_s}{\partial x_s} \right)_{x_s=0} &= -2 \left( 1 - \frac{v_b}{v_s} \right) \phi_c^{-2} \left( \frac{\partial \phi}{\partial x_s} \right)_{x_s=0} + \dots \\ &2 \frac{v_b}{v_s} \phi_c^{-3} \left( \frac{\partial \phi}{\partial x_s} \right)_{x_s=0}^2 - \frac{v_b}{v_s} \phi_c^{-2} \left( \frac{\partial^2 \phi}{\partial x_s^2} \right)_{x_s=0}, \end{aligned} \quad (10)$$

as provided in the main text.

Table 1: Sphere-chain packing at infinite sphere dilution:  $N = 21$ ;  $\phi(x_s = 0) \approx 0.416$ .

| $a_s 2\pi/l_K$ | $\bar{V}_s^0$ | $\bar{V}_s^1$ | $\partial\phi/\partial x_s _{x_s=0}$ | $\partial^2\phi/\partial x_s^2 _{x_s=0}$ |
|----------------|---------------|---------------|--------------------------------------|------------------------------------------|
| 0.322          | 0.98          | 7.03          | 0.57                                 | -2.65                                    |
| 0.483          | 1.28          | -0.62         | 1.52                                 | -6.86                                    |
| 0.804          | 1.59          | -1.84         | 5.12                                 | -60.7                                    |
| 1.13           | 1.76          | -1.73         | 11.0                                 | -360                                     |
| 1.77           | 1.52          | -2.05         | 59.0                                 | -6710                                    |
| 2.57           | 1.44          | -2.56         | 198                                  | -22400                                   |
| 3.22           | 1.36          | -2.19         | 419                                  | -250000                                  |

## 4 Sphere-chain mixture density data

The figures and tables below summarise the principal experimental data ( $\phi$  versus  $x_s$  for various  $N$  and  $a_s$ ) and various quantities derived from it, as detailed in the main text. Note that Redlich-Kister polynomials of the form

$$\phi = \sum_{i=0}^n b_i (2x_s - 1)^i \quad (11)$$

were fit to this data using least-squares minimisation, implemented by the Matlab function `polyfit`. Generally, setting  $n \leq 8$  furnished robust estimates of the Redlich-Kister coefficients  $b_i$  when fitting to data with  $x_s \lesssim 0.5$ . Accordingly,

$$\phi(x_s = 0) = \sum_{i=0}^n b_i (-1)^i, \quad (12)$$

$$\left(\frac{\partial\phi}{\partial x_s}\right)_{x_s=0} = 2 \sum_{i=1}^n i b_i (-1)^{i-1}, \quad (13)$$

$$\left(\frac{\partial^2\phi}{\partial x_s^2}\right)_{x_s=0} = 2^2 \sum_{i=2}^n i(i-1) b_i (-1)^{i-2}, \quad (14)$$

which, in turn, furnish the equations for  $\bar{V}_s^0$  and  $\bar{V}_s^1$  in the main text.

Table 2: Same as table 1, but with  $N = 46$ ;  $\phi(x_s = 0) \approx 0.384$ .

| $a_s 2\pi/l_K$ | $\bar{V}_s^0$ | $\bar{V}_s^1$ | $\partial\phi/\partial x_s _{x_s=0}$ | $\partial^2\phi/\partial x_s^2 _{x_s=0}$ |
|----------------|---------------|---------------|--------------------------------------|------------------------------------------|
| 0.322          | 0.611         | 8.34          | 0.681                                | -1.93                                    |
| 0.483          | 1.14          | 0.116         | 1.69                                 | -8.58                                    |
| 0.804          | 1.84          | -2.14         | 4.06                                 | -41.0                                    |
| 1.13           | 2.15          | -1.75         | 9.32                                 | -250                                     |
| 1.77           | 1.91          | -2.29         | 39.0                                 | -2780                                    |
| 2.57           | 1.58          | -3.17         | 179                                  | -4990                                    |
| 3.22           | 1.44          | -2.90         | 398                                  | -135000                                  |

Table 3: Same as table 1, but with  $N = 100$ ;  $\phi(x_s = 0) \approx 0.377$ .

| $a_s 2\pi/l_K$ | $\bar{V}_s^0$ | $\bar{V}_s^1$ | $\partial\phi/\partial x_s _{x_s=0}$ | $\partial^2\phi/\partial x_s^2 _{x_s=0}$ |
|----------------|---------------|---------------|--------------------------------------|------------------------------------------|
| 0.322          | 0.288         | 10.0          | 0.778                                | -1.71                                    |
| 0.483          | 1.04          | 1.03          | 1.79                                 | -10.7                                    |
| 0.804          | 2.28          | -1.48         | 1.89                                 | -10.8                                    |
| 1.13           | 2.44          | -1.00         | 3.08                                 | -26.2                                    |
| 1.77           | 2.17          | -2.33         | 26.5                                 | -1320                                    |
| 2.57           | 1.79          | -3.00         | 145                                  | -6500                                    |
| 3.22           | 1.64          | -2.87         | 333                                  | -134000                                  |

Table 4: Same as table 1, but with  $N = 214$ ;  $\phi(x_s = 0) \approx 0.372$ .

| $a_s 2\pi/l_K$ | $\bar{V}_s^0$ | $\bar{V}_s^1$ | $\partial\phi/\partial x_s _{x_s=0}$ | $\partial^2\phi/\partial x_s^2 _{x_s=0}$ |
|----------------|---------------|---------------|--------------------------------------|------------------------------------------|
| 0.322          | 0.236         | 12.8          | 0.790                                | -2.29                                    |
| 0.483          | 1.06          | 0.987         | 1.75                                 | -10.4                                    |
| 0.804          | 2.34          | -1.45         | 1.76                                 | -9.31                                    |
| 1.13           | 2.49          | -0.930        | 2.69                                 | -19.7                                    |
| 1.77           | 2.21          | -2.08         | 25.7                                 | -307                                     |
| 2.57           | 1.81          | -3.11         | 145                                  | -5870                                    |
| 3.22           | 1.65          | -2.90         | 326                                  | -141000                                  |

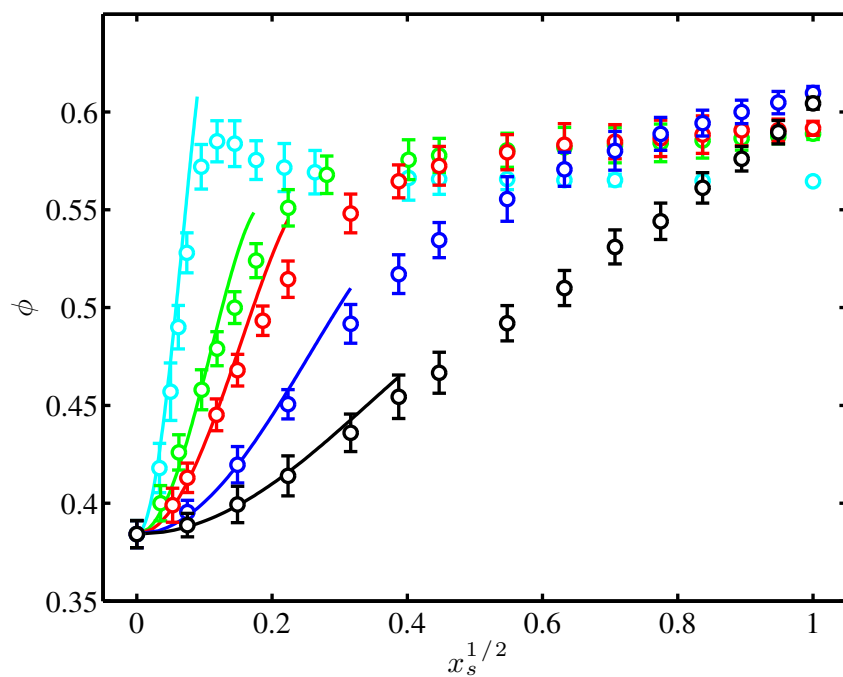

Figure 2: Same as figure 3b in the main text, but with  $N = 46$ .

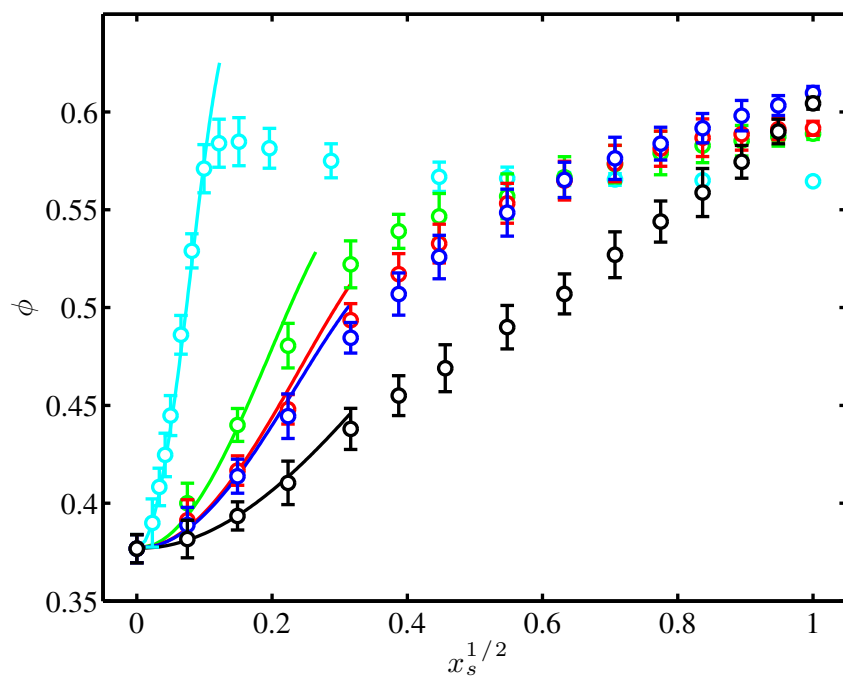

Figure 3: Same as figure 3b in the main text, but with  $N = 100$ .

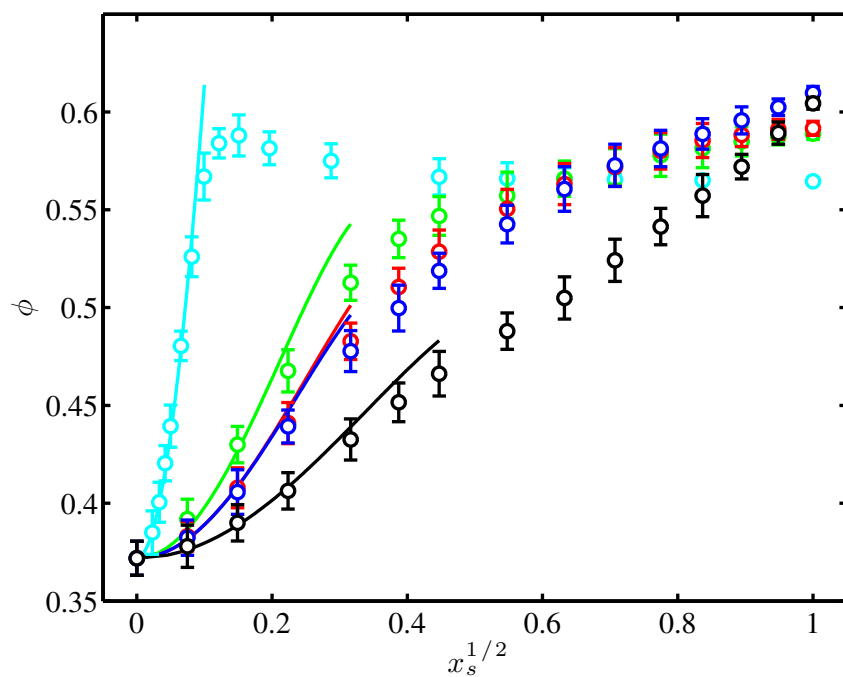

Figure 4: Same as figure 3b in the main text, but with  $N = 214$ .

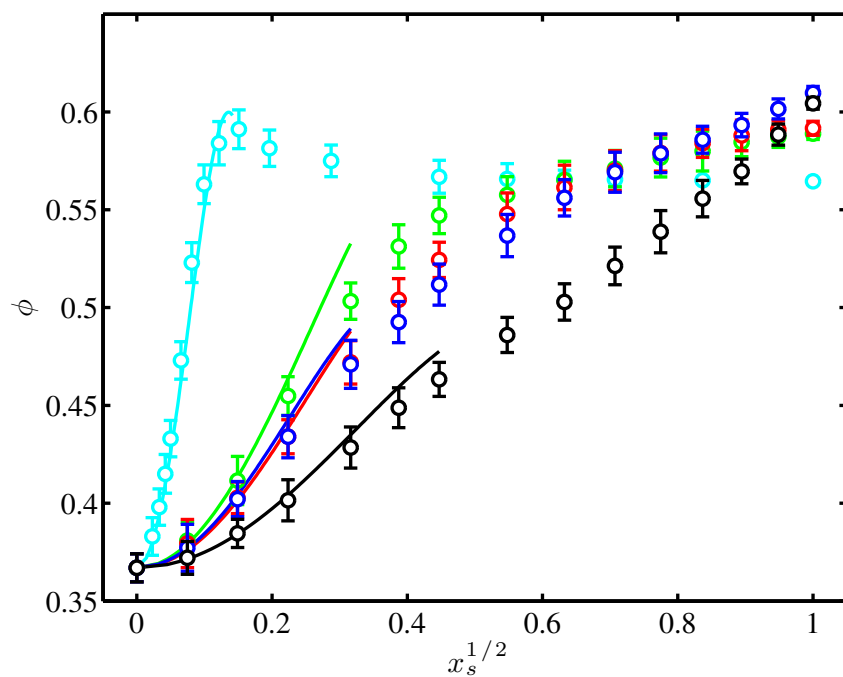

Figure 5: Same as figure 3b in the main text, but with  $N = 1000$ .

Table 5: Same as table 1, but with  $N = 1000$ ;  $\phi(x_s = 0) \approx 0.367$ .

| $a_s 2\pi/l_K$ | $\bar{V}_s^0$ | $\bar{V}_s^1$ | $\partial\phi/\partial x_s _{x_s=0}$ | $\partial^2\phi/\partial x_s^2 _{x_s=0}$ |
|----------------|---------------|---------------|--------------------------------------|------------------------------------------|
| 0.322          | 0.140         | 14.9          | 0.806                                | -2.53                                    |
| 0.483          | 1.01          | 1.58          | 1.80                                 | -11.6                                    |
| 0.804          | 2.39          | -1.43         | 1.65                                 | -8.80                                    |
| 1.13           | 2.56          | -0.811        | 2.21                                 | -11.0                                    |
| 1.77           | 2.24          | -2.00         | 25.3                                 | -1370                                    |
| 2.57           | 1.81          | -3.23         | 146                                  | -5230                                    |
| 3.22           | 1.66          | -3.22         | 332                                  | -82500                                   |
